# Supplementary material for: An insight into the non-covalent interactions in the solid state structures of dinuclear cobalt(ii) complexes with N,O-donor ligands: application of the complexes in the fabrication of Schottky devices
Source: Royal Society of Chemistry journal article supplement (doi:10.1039/d2ce01282k), 2022-12-27
Supplement: d2ce01282k1.pdf [file d2ce01282k1.pdf]

## Supplementary Information

### **An insight into the non-covalent interactions in the solid state structures of dinuclear cobalt(II) complexes with N,O-donor ligands: Application of the complexes in the fabrication of Schottky devices**

Rabi Sankar Sarkar<sup>1</sup>, Animesh Biswas<sup>2,3</sup>, Partha Pratim Ray<sup>3\*</sup>, Rosa M. Gomila<sup>4</sup>, Michael G. B. Drew,<sup>5</sup> Snehasis Banerjee,<sup>6</sup> Antonio Frontera<sup>4\*</sup> and Shouvik Chattopadhyay<sup>1\*</sup>

<sup>1</sup>Department of Chemistry, Inorganic Section, Jadavpur University, Kolkata 700032, India. E-mail: [shouvik.chem@gmail.com](mailto:shouvik.chem@gmail.com)

<sup>2</sup>Department of Physics, Sreegopal Banerjee College, Hooghly 712148, West Bengal

<sup>3</sup>Department of Physics, Jadavpur University, Kolkata 700032, India. E-mail: [partha@phys.jdvu.ac.in](mailto:partha@phys.jdvu.ac.in); Fax: +91 3324138917

<sup>4</sup>Department of Chemistry, Universitat de les Illes Balears, Crta de Valldemossa km 7.5, 07122 palma de Mallorca, Spain

<sup>5</sup> *School of Chemistry, The University of Reading, P.O. Box 224, Whiteknights, Reading RG6 6AD, UK.*

<sup>6</sup> Department of Higher Education, (University Branch) Government of West Bengal, Bikash Bhavan, Salt Lake, Kolkata-91, INDIA

Correspondence: [toni.frontera@uib.es](mailto:toni.frontera@uib.es) (A.F.); [parthapray@yahoo.com](mailto:parthapray@yahoo.com) (P.P.R); [shouvik.chem@gmail.com](mailto:shouvik.chem@gmail.com) (S.C.).

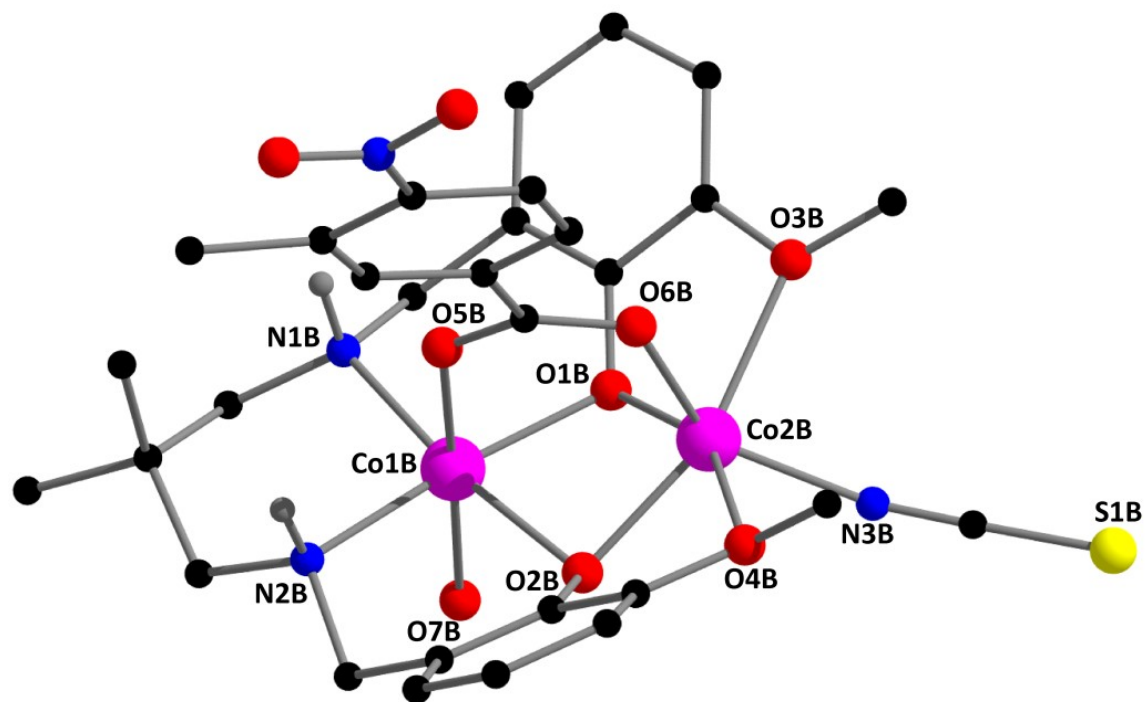

**Fig. S1.** Perspective view of the sub-unit B of complex **1**. Hydrogen atoms have been omitted for clarity.

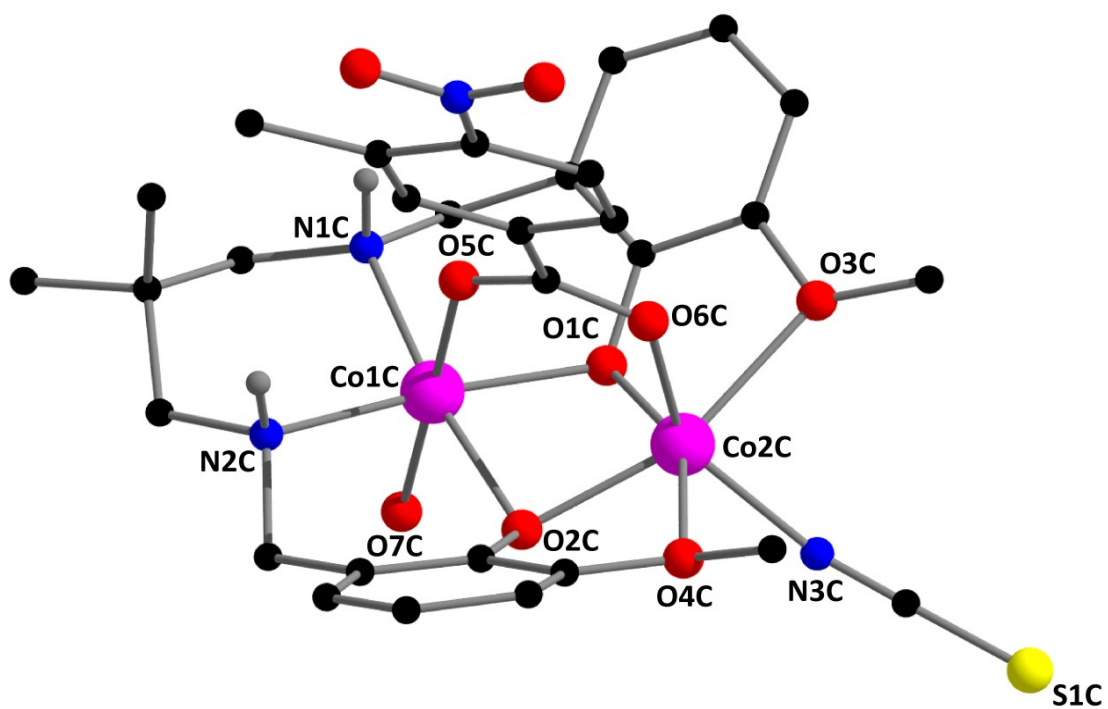

**Fig. S2.** Perspective view of the sub-unit C of complex 1. Hydrogen atoms have been omitted for clarity.

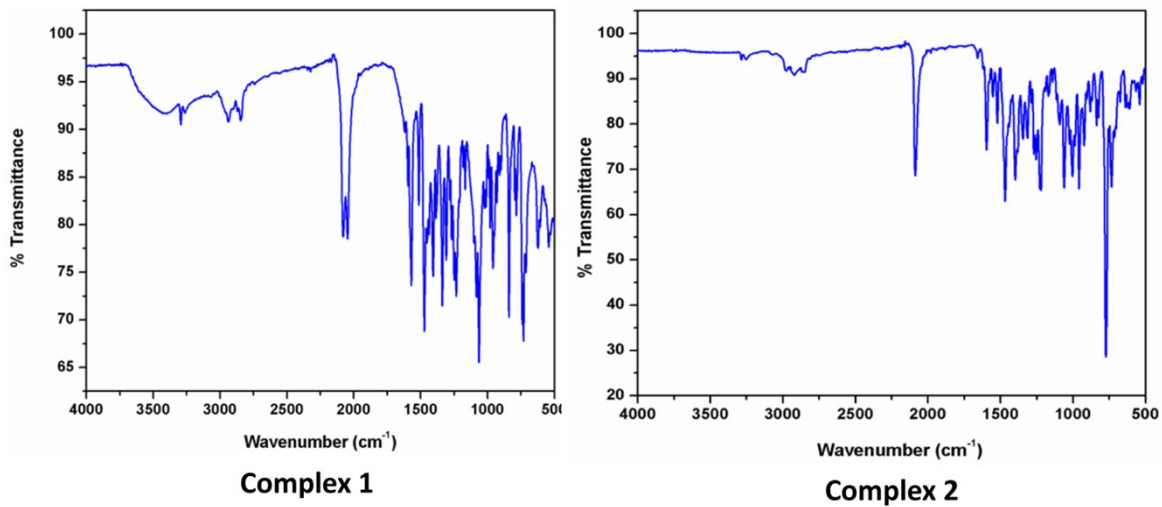

Fig. S3. IR spectra of complexes 1(left) and 2 (right).

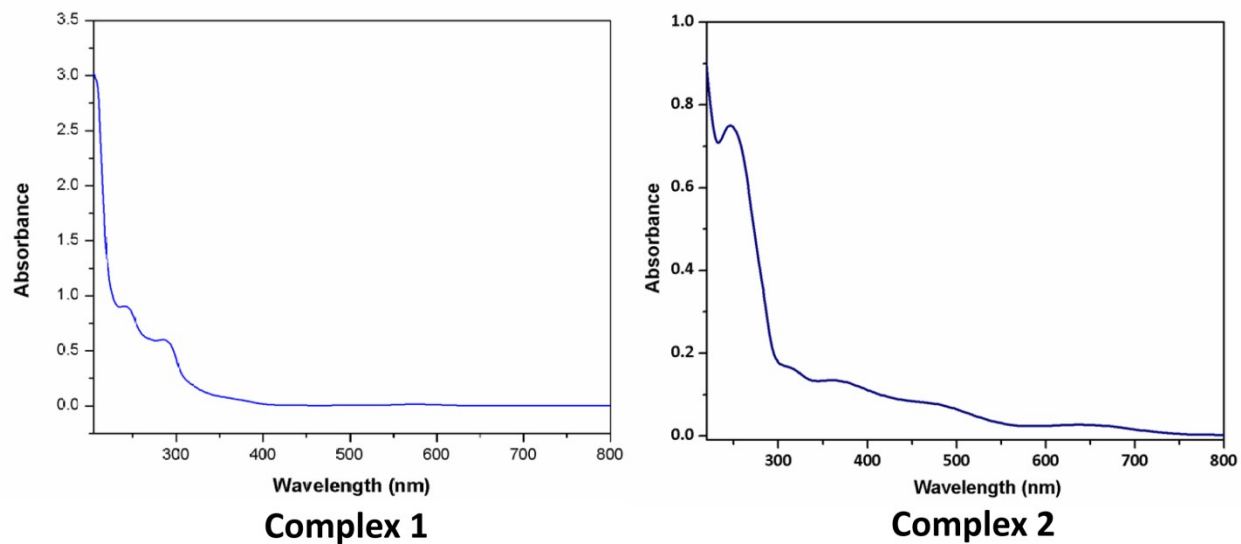

Fig. S4. UV-vis spectra of complexes 1 and 2.

### Hirshfeld Surface analysis

Hirshfeld surfaces<sup>1-3</sup> and the fingerprint<sup>4-5</sup>(2D) plots were calculated using Crystal Explorer.<sup>6-7</sup>

### Hirshfeld surface analysis

The Hirshfeld surfaces of both complexes, mapped over  $d_{norm}$  (range -0.1 Å to 1.5 Å), have been shown in Figure 4. Red spots on these surfaces are indicative of the principal interactions (Figure S5) which include C...H/H...C, N...H/H...N and O...H/H...O (for **1**), C...H/H...C, O...H/H...O and S...H/H...S (for **2**) interactions. These interactions appear as distinct spikes in the 2D fingerprint plots (Figure S6).

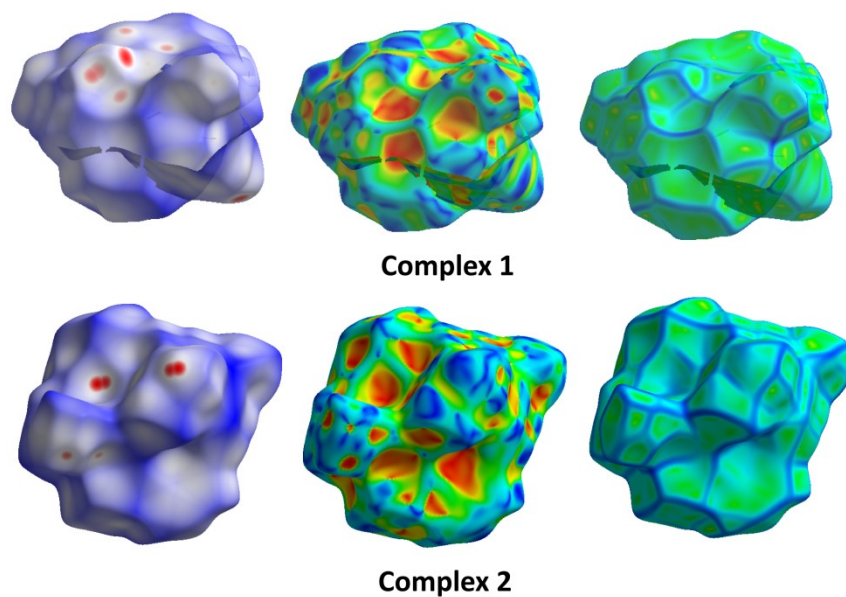

**Figure S5.** Hirshfeld surfaces mapped with  $d_{norm}$  (left), shape index (middle) and curvedness (right) for complex **1** (top) and complex **2** (bottom)

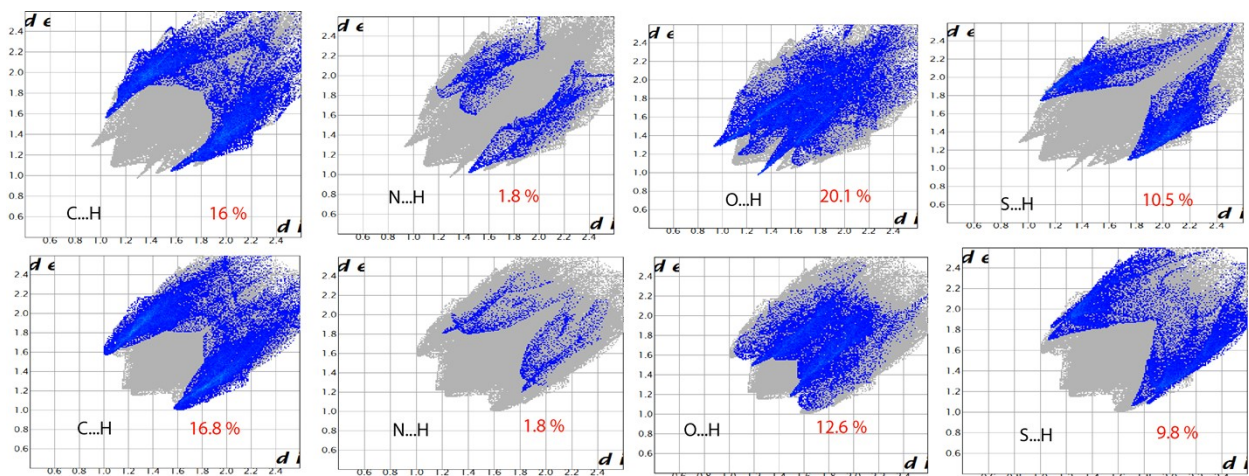

**Figure S6.** Fingerprint plots: different contacts contributed to the total Hirshfeld surface area of complexes **1**(top) and **2**(bottom)

**Table S1.** Selected bond lengths (Å) of complexes **1** and **2**

|            | Complex - 1 |           |           | Complex - 2 |
|------------|-------------|-----------|-----------|-------------|
|            | Subunit A   | Subunit B | Subunit C |             |
| Co(1)–O(1) | 2.087(4)    | 2.086(4)  | 2.088(4)  | 2.111(2)    |
| Co(1)–O(2) | 2.103(4)    | 2.108(4)  | 2.101(4)  | 2.046(2)    |
| Co(1)–O(5) | 2.124(4)    | 2.123(3)  | 2.122(4)  | 2.118(2)    |
| Co(1)–O(7) | 2.141(4)    | 2.146(4)  | 2.135(4)  | 2.125(2)    |
| Co(1)–N(1) | 2.106(5)    | 2.119(4)  | 2.105(5)  | 2.100(2)    |

|            |          |          |          |          |
|------------|----------|----------|----------|----------|
| Co(1)–N(2) | 2.113(5) | 2.106(4) | 2.109(5) | 2.125(2) |
| Co(2)–O(1) | 2.015(4) | 2.018(4) | 2.013(4) | 2.023(2) |
| Co(2)–O(2) | 2.048(4) | 2.042(4) | 2.040(4) | 2.004(2) |
| Co(2)–O(3) | 2.314(6) | 2.319(6) | 2.321(6) | 2.518(2) |
| Co(2)–O(4) | 2.350(5) | 2.348(5) | 2.347(5) | 2.387(4) |
| Co(2)–O(6) | 2.032(4) | 2.025(4) | 2.027(4) | 2.030(2) |
| Co(2)–N(3) | 1.997(6) | 1.995(6) | 1.998(6) | 1.980(3) |

**Table S2.** Selected bond angles (°) of complexes **1-2**.

|                 | Complex 1 |           |           | Complex 2 |
|-----------------|-----------|-----------|-----------|-----------|
|                 | Subunit A | Subunit B | Subunit C |           |
| O(1)–Co(1)–O(2) | 80.33(16) | 80.14(16) | 79.94(16) | 80.28(8)  |
| O(1)–Co(1)–O(5) | 92.74(15) | 92.76(16) | 92.90(16) | 88.74(8)  |
| O(1)–Co(1)–O(7) | 89.77(19) | 90.02(18) | 89.2(2)   | 93.66(8)  |

|                 |            |            |            |            |
|-----------------|------------|------------|------------|------------|
| O(1)–Co(1)–N(1) | 91.81(17)  | 91.84(18)  | 92.10(18)  | 91.62(8)   |
| O(1)–Co(1)–N(2) | 172.78(17) | 172.89(19) | 172.72(17) | 172.03(9)  |
| O(2)–Co(1)–O(5) | 90.47(15)  | 90.62(15)  | 90.38(15)  | 92.09(8)   |
| O(2)–Co(1)–O(7) | 87.67(18)  | 87.6(2)    | 87.53(19)  | 90.97(8)   |
| O(2)–Co(1)–N(1) | 172.12(18) | 171.96(17) | 172.00(18) | 171.88(8)  |
| O(2)–Co(1)–N(2) | 92.61(17)  | 92.87(17)  | 92.88(17)  | 91.93(9)   |
| O(5)–Co(1)–O(7) | 176.6(2)   | 176.4(2)   | 176.8(2)   | 176.40(8)  |
| O(5)–Co(1)–N(1) | 89.23(16)  | 89.19(16)  | 89.22(16)  | 87.15(9)   |
| O(5)–Co(1)–N(2) | 85.75(17)  | 85.98(15)  | 85.85(17)  | 89.87(9)   |
| O(7)–Co(1)–N(1) | 93.0(2)    | 93.1(2)    | 93.2(2)    | 90.12(9)   |
| O(7)–Co(1)–N(2) | 91.5(2)    | 91.0(2)    | 91.8(2)    | 88.12(9)   |
| N(1)–Co(1)–N(2) | 95.22(17)  | 95.13(18)  | 95.06(18)  | 96.15(9)   |
| O(1)–Co(2)–O(2) | 83.39(16)  | 83.37(17)  | 83.20(16)  | 83.47(8)   |
| O(1)–Co(2)–O(6) | 99.34(17)  | 99.21(18)  | 99.42(18)  | 98.04(9)   |
| O(1)–Co(2)–N(3) | 114.8(2)   | 114.8(2)   | 114.8(3)   | 106.73(12) |
| O(2)–Co(2)–O(6) | 97.42(17)  | 97.55(16)  | 97.25(17)  | 99.18(9)   |



|                 |            |            |            |            |
|-----------------|------------|------------|------------|------------|
| O(2)-Co(2)-N(3) | 112.3(3)   | 112.1(3)   | 112.1(3)   | 114.24(12) |
| O(6)-Co(2)-N(3) | 136.3(3)   | 136.4(2)   | 136.6(3)   | 139.97(12) |
| O(3)-Co(2)-O(1) | 73.52(17)  | 73.56(18)  | 73.86(18)  | 71.05(8)   |
| O(3)-Co(2)-O(2) | 156.29(17) | 156.25(18) | 156.29(17) | 153.22(8)  |
| O(3)-Co(2)-O(6) | 81.4(2)    | 81.0(2)    | 81.0(2)    | 77.01(9)   |
| O(3)-Co(2)-N(3) | 83.0(3)    | 83.3(3)    | 83.6(3)    | 81.87(11)  |
| O(3)-Co(2)-O(4) | 129.72(17) | 129.77(18) | 129.50(19) | 133.26(9)  |
| O(4)-Co(2)-O(1) | 154.98(17) | 154.92(17) | 154.89(18) | 155.34(9)  |
| O(4)-Co(2)-O(2) | 72.37(17)  | 72.29(17)  | 72.39(17)  | 71.87(9)   |
| O(4)-Co(2)-O(6) | 78.26(18)  | 78.63(18)  | 78.45(18)  | 86.10(11)  |
| O(4)-Co(2)-N(3) | 81.0(2)    | 80.8(2)    | 80.8(2)    | 84.16(13)  |
|                 |            |            |            |            |
|                 |            |            |            |            |

**Table S3.** Bond valence sum calculation and the related parameters of subunit **A** in complex **1**.

| <i>i-j</i><br><i>reported</i> | $r_0$ | <i>i-j</i><br><i>this complex</i> | $r_{ij}$ | $S_{ij}$ | $Z_j$ |
|-------------------------------|-------|-----------------------------------|----------|----------|-------|
| O–Co <sup>2+</sup>            | 1.68  | O(1)-Co(1)                        | 2.087    | 0.332    | 2.103 |
| O–Co <sup>2+</sup>            | 1.68  | O(2)-Co(1)                        | 2.103    | 0.318    |       |
| O–Co <sup>2+</sup>            | 1.68  | O(5)-Co(1)                        | 2.124    | 0.301    |       |
| O–Co <sup>2+</sup>            | 1.68  | O(7)-Co(1)                        | 2.141    | 0.287    |       |
| N–Co <sup>2+</sup>            | 1.80  | N(1)–Co(1)                        | 2.106    | 0.436    |       |
| N–Co <sup>2+</sup>            | 1.80  | N(2)–Co(1)                        | 2.113    | 0.429    |       |
| O–Co <sup>2+</sup>            | 1.68  | O(1)-Co(2)                        | 2.015    | 0.404    |       |
| O–Co <sup>2+</sup>            | 1.68  | O(2)-Co(2)                        | 2.048    | 0.369    |       |
| O–Co <sup>2+</sup>            | 1.68  | O(3)-Co(2)                        | 2.314    | 0.180    |       |
| O–Co <sup>2+</sup>            | 1.68  | O(4)-Co(2)                        | 2.350    | 0.163    |       |

|                    |      |            |       |       |  |
|--------------------|------|------------|-------|-------|--|
| O-Co <sup>2+</sup> | 1.68 | O(6)-Co(2) | 2.031 | 0.387 |  |
| N-Co <sup>2+</sup> | 1.80 | N(3)-Co(2) | 1.997 | 0.587 |  |

**Table S4.** Bond valence sum calculation and the related parameters of subunit **B** in complex **1**.

| <i>i-j</i><br><i>reported</i> | $r_0$ | <i>i-j</i><br><i>this complex</i> | $r_{ij}$ | $S_{ij}$ | $Z_j$ |
|-------------------------------|-------|-----------------------------------|----------|----------|-------|
| O-Co <sup>2+</sup>            | 1.68  | O(1)-Co(1)                        | 2.086    | 0.333    | 2.091 |
| O-Co <sup>2+</sup>            | 1.68  | O(2)-Co(1)                        | 2.108    | 0.314    |       |
| O-Co <sup>2+</sup>            | 1.68  | O(5)-Co(1)                        | 2.123    | 0.302    |       |
| O-Co <sup>2+</sup>            | 1.68  | O(7)-Co(1)                        | 2.146    | 0.283    |       |
| N-Co <sup>2+</sup>            | 1.80  | N(1)-Co(1)                        | 2.119    | 0.422    |       |
| N-Co <sup>2+</sup>            | 1.80  | N(2)-Co(1)                        | 2.106    | 0.437    |       |
| O-Co <sup>2+</sup>            | 1.68  | O(1)-Co(2)                        | 2.018    | 0.401    | 2.100 |
| O-Co <sup>2+</sup>            | 1.68  | O(2)-Co(2)                        | 2.042    | 0.375    |       |
| O-Co <sup>2+</sup>            | 1.68  | O(3)-Co(2)                        | 2.319    | 0.177    |       |

|                    |      |            |       |       |  |
|--------------------|------|------------|-------|-------|--|
| O–Co <sup>2+</sup> | 1.68 | O(4)–Co(2) | 2.348 | 0.164 |  |
| O–Co <sup>2+</sup> | 1.68 | O(6)–Co(2) | 2.025 | 0.393 |  |
| N–Co <sup>2+</sup> | 1.80 | N(3)–Co(2) | 1.995 | 0.590 |  |

**Table S5.** Bond valence sum calculation and the related parameters of subunit C in complex 1.

| <i>i–j</i><br><i>reported</i> | $r_0$ | <i>i–j</i><br><i>this complex</i> | $r_{ij}$ | $S_{ij}$ | $Z_j$ |
|-------------------------------|-------|-----------------------------------|----------|----------|-------|
| O–Co <sup>2+</sup>            | 1.68  | O(1)–Co(1)                        | 2.088    | 0.331    | 2.144 |
| O–Co <sup>2+</sup>            | 1.68  | O(2)–Co(1)                        | 2.101    | 0.320    |       |
| O–Co <sup>2+</sup>            | 1.68  | O(5)–Co(1)                        | 2.122    | 0.302    |       |
| O–Co <sup>2+</sup>            | 1.68  | O(7)–Co(1)                        | 2.135    | 0.291    |       |
| N–Co <sup>2+</sup>            | 1.80  | N(1)–Co(1)                        | 2.105    | 0.437    |       |
| N–Co <sup>2+</sup>            | 1.80  | N(2)–Co(1)                        | 2.109    | 0.433    |       |
| O–Co <sup>2+</sup>            | 1.68  | O(1)–Co(2)                        | 2.103    | 0.331    | 2.002 |

|                    |      |            |       |       |  |
|--------------------|------|------------|-------|-------|--|
| O-Co <sup>2+</sup> | 1.68 | O(2)-Co(2) | 2.040 | 0.377 |  |
| O-Co <sup>2+</sup> | 1.68 | O(3)-Co(2) | 2.321 | 0.176 |  |
| O-Co <sup>2+</sup> | 1.68 | O(4)-Co(2) | 2.347 | 0.164 |  |
| O-Co <sup>2+</sup> | 1.68 | O(6)-Co(2) | 2.027 | 0.369 |  |
| N-Co <sup>2+</sup> | 1.80 | N(3)-Co(2) | 1.998 | 0.585 |  |

**Table S6.** Bond valence sum calculation and the related parameters of complex **2**.

| <i>i-j</i><br><i>reported</i> | $r_0$ | <i>i-j</i><br><i>this complex</i> | $r_{ij}$ | $S_{ij}$ | $Z_j$ |
|-------------------------------|-------|-----------------------------------|----------|----------|-------|
| O-Co <sup>2+</sup>            | 1.68  | O(1)-Co(1)                        | 2.111    | 0.311    | 2.146 |
| O-Co <sup>2+</sup>            | 1.68  | O(2)-Co(1)                        | 2.046    | 0.370    |       |
| O-Co <sup>2+</sup>            | 1.68  | O(5)-Co(1)                        | 2.118    | 0.306    |       |
| O-Co <sup>2+</sup>            | 1.68  | O(7)-Co(1)                        | 2.125    | 0.300    |       |
| N-Co <sup>2+</sup>            | 1.80  | N(1)-Co(1)                        | 2.100    | 0.444    |       |
| N-Co <sup>2+</sup>            | 1.80  | N(2)-Co(1)                        | 2.125    | 0.415    |       |
| O-Co <sup>2+</sup>            | 1.68  | O(1)-Co(2)                        | 2.023    | 0.395    | 2.065 |
| O-Co <sup>2+</sup>            | 1.68  | O(2)-Co(2)                        | 2.004    | 0.416    |       |

|                    |      |            |       |       |  |
|--------------------|------|------------|-------|-------|--|
| O–Co <sup>2+</sup> | 1.68 | O(3)-Co(2) | 2.518 | 0.103 |  |
| O–Co <sup>2+</sup> | 1.68 | O(4)-Co(2) | 2.387 | 0.147 |  |
| O–Co <sup>2+</sup> | 1.68 | O(6)-Co(2) | 2.030 | 0.388 |  |
| N–Co <sup>2+</sup> | 1.80 | N(3)–Co(2) | 1.979 | 0.616 |  |
|                    |      |            |       |       |  |

## ESI References

1. M. A. Spackman and D. Jayatilaka, *CrystEngComm*, 2009, **11**, 19-32.
2. C. M. Z. Wilson, M. Ho, A. M. N. Lopez and S. Casassa, *Theor Chem Acc.*, 2016, **135**, 188.
3. H. F. Clausen, M. S. Chevallier, M. A. Spackman, B. B. Iversen, *New J. Chem.*, **2010**, *34*, 193-199.
4. A. L. Rohl, M. Moret, W. Kaminsky, K. Claborn, J. J. McKinnon and B. Kahr, *Cryst. Growth Des.*, 2008, **8**, 4517-4525.
5. A. Parkin, G. Barr, W. Dong, C. G. Gilmore, D. Jayatilaka, J. J. McKinnon, M. A. Spackman and C. C. Wilson, *CrystEngComm*, 2007, **9**, 648-652.
6. M. A. Spackman and J. J. McKinnon, *CrystEngComm*, 2002, **4**, 378-392.
7. S. K. Seth, P. Manna, N. J. Singh, M. Mitra, A. D. Jana, A. Das, S. R. Choudhury, T. Kar, S. Mukhopadhyay and K.S. Kim, *CrystEngComm*, 2013, **15**, 1285-1288.
